# Supplementary material for: A new chemosensor for cyanide in blood based on the Pd complex of 2-(5-bromo-2-pyridylazo)-5-[N-n-propyl-N-(3-sulfopropyl)amino]phenol
Source: Royal Society of Chemistry journal article supplement (doi:10.1039/d0an01554g), 2020-01-01
Supplement: d0an01554g1.pdf [file d0an01554g1.pdf]

## Electronic Supplementary Information

### A new chemosensor for cyanide in blood based on the Pd complex of 2-(5-bromo-2-pyridylazo)-5-[*N-n*-propyl-*N*-(3-sulfopropyl)amino]phenol †

Yasuhiro Morikawa, Keiji Nishiwaki, Shigeo Suzuki, Naoyuki Yasaka, Yuto Okada and Isao Nakanishi

#### Experimental Section

##### Preparation of solutions with specific pHs

Various pH solutions of PAPS-Pd were prepared by mixing 0.1 mL of PAPS (1 mM) in pure water with 0.1 mL of PdCl<sub>2</sub> (1 mM) in 0.2% hydrochloric acid and diluting in a 10 mL measuring flask with 0.1 M buffer (pH 1 to 13). A buffer solutions were prepared as follows. A solution with pH 1 was prepared with 0.1 M hydrochloric acid. A series of buffers with pH 2 to 6 were prepared by Hydrochloric acid was added to 10 mL of 1 M sodium dihydrogen phosphate to make the total volume to 100 mL. A series of buffers with pH 6.5 to 11 were prepared by 6 M hydrochloric acid was added to 10 mL of 1 M sodium carbonate solution to make the total volume to 100 mL. A buffers with pH 12 and 13 were prepared by 30% sodium hydroxide solution was added to 10 mL of 1 M sodium carbonate solution to make the total volume to 100 mL.

##### Job's plot measurement

For PAPS and Pd<sup>2+</sup>: A 20 μM solution of PAPS was prepared by dissolving in a 65:35 (v/v) mixture of 1 M sodium carbonate/1 M sodium bicarbonate. Similarly, 20 μM solution of Pd<sup>2+</sup> (PdCl<sub>2</sub>) was prepared by dissolving in 0.2% hydrochloric acid. Mixture solutions (2.0 mL) of PAPS and Pd<sup>2+</sup> at 11 different ratios from 0:2 to 2:0 (v/v) were prepared. After the solutions were allowed to stand for 30 min, the absorbance at 570 nm was measured at room temperature. The absorbance values obtained were plotted against [Pd<sup>2+</sup>]/([PAPS] + [Pd<sup>2+</sup>]), and the complex formation ratio was estimated from the abscissa at the maximum absorbance.

For PAPS-Pd and CN<sup>-</sup>: Each 20 μM PAPS-Pd and CN<sup>-</sup> (KCN) solution was prepared by diluting stock solutions. Mixture solutions (2.0 mL) of PAPS-Pd and CN<sup>-</sup> with nine different ratio from 0:2 to 2:0 (v/v) were prepared. After the solutions were allowed to stand for 30 min, the absorbance at 450 nm was measured at room temperature. The absorbance values obtained were plotted against [CN<sup>-</sup>]/([PAPS-Pd] + [CN<sup>-</sup>]), and the complex formation ratio was estimated from the abscissa at the maximum absorbance.

##### UV-vis measurement of mixtures of PAPS-Pd and cyanide

The stock solution of PAPS-Pd (100 μM, 0.3 mL) was mixed with 2.7 mL of water to make the final

concentration of 10  $\mu\text{M}$ , and mixed with 6–72  $\mu\text{L}$  of 2 mM  $\text{CN}^-$ . After mixing the solution for several seconds, UV-vis spectra were measured at room temperature.

### Measurement of $\text{CN}^-$ in blood samples by König reaction as the reference

$\text{CN}^-$ -spiked blood (10, 20, and 30  $\mu\text{M}$ ) was applied to the König reaction according to the procedure reported by Epstein.<sup>51</sup> A Conway cell was used for the reaction. Briefly, the solution (0.5 mL) after microdiffusion was placed into a test tube. The chloramine T solution (0.1 mL) was added to the test tube and left for 2 min. Then, the pyridine-pyrazolone reagent (1.5 mL) was added to the test tube. After 40 min, UV-vis spectra were measured. Standard  $\text{CN}^-$  solutions were used for preparation of a calibration curve.

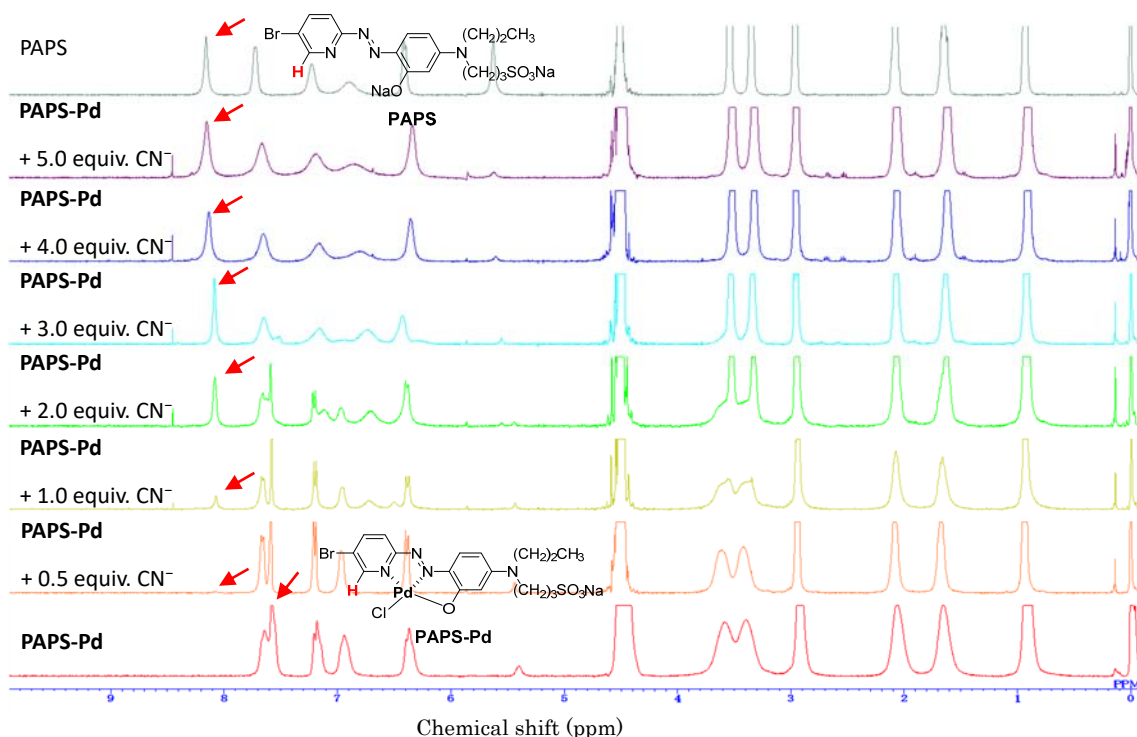

**Fig. S1.**  $^1\text{H}$  NMR spectra of PAPS, PAPS-Pd, and PAPS-Pd with addition of  $\text{CN}^-$  (0.5–5 equiv.) in  $\text{D}_2\text{O}$ . The red arrows indicated the proton on the 6-position of the pyridine ring.

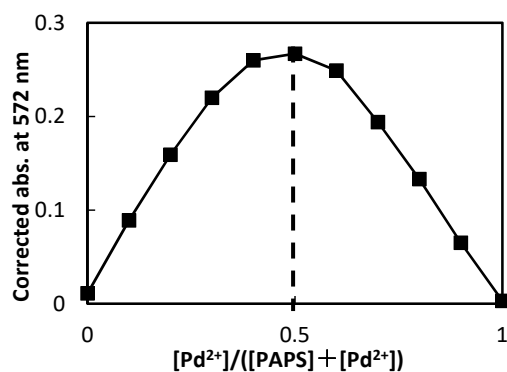

**Fig. S2.** Job's plot used to determine the complexation ratio between PAPS and Pd<sup>2+</sup>. Corrected absorbance is the difference between measured absorbance ( $A_{\text{obs}}$ ) at 572 nm and the product of the molar extinction coefficient of PAPS ( $\epsilon_{\text{PAPS}}$ ) and the initial molar concentration ( $[\text{PAPS}]$ ); Corrected absorbance =  $A_{\text{obs}} - \epsilon_{\text{PAPS}} [\text{PAPS}]$ .

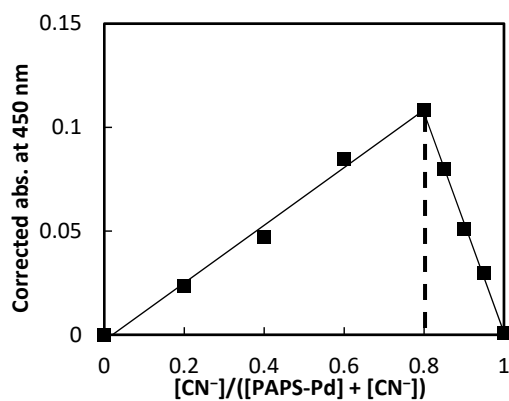

**Fig. S3.** Job's plot for the binding of CN<sup>-</sup> with PAPS-Pd. Corrected absorbance was plotted as a function of the molar ratio of  $[\text{CN}^-]/([\text{PAPS-Pd}] + [\text{CN}^-])$  and the total concentration of PAPS-Pd + CN<sup>-</sup> was 20  $\mu\text{M}$ . Corrected absorbance is the difference between the measured absorbance ( $A_{\text{obs}}$ ) at 450 nm and the product of the molar concentration of PAPS-Pd ( $\epsilon_{\text{PAPS-Pd}}$ ) and the initial molar extinction coefficient ( $[\text{PAPS-Pd}]$ ); Corrected absorbance =  $A_{\text{obs}} - \epsilon_{\text{PAPS-Pd}} [\text{PAPS-Pd}]$ .

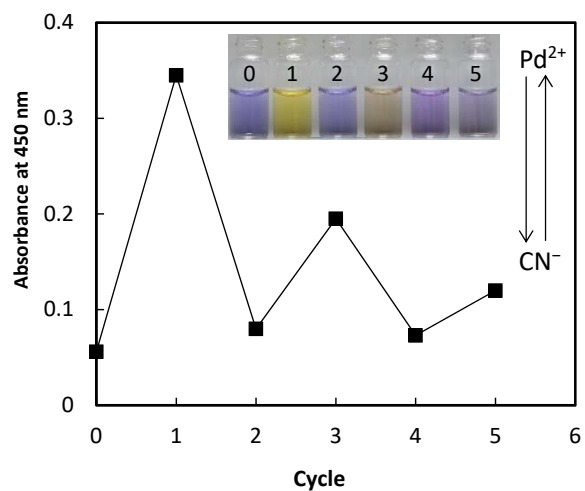

**Fig. S4.** Reversible switching cycles of absorbance at 450 nm by alternate addition of  $\text{Pd}^{2+}$  ions and  $\text{CN}^-$  in pH 10.2 carbonate buffer. The inset shows the color of the solution at each cycle in the switching cycle.

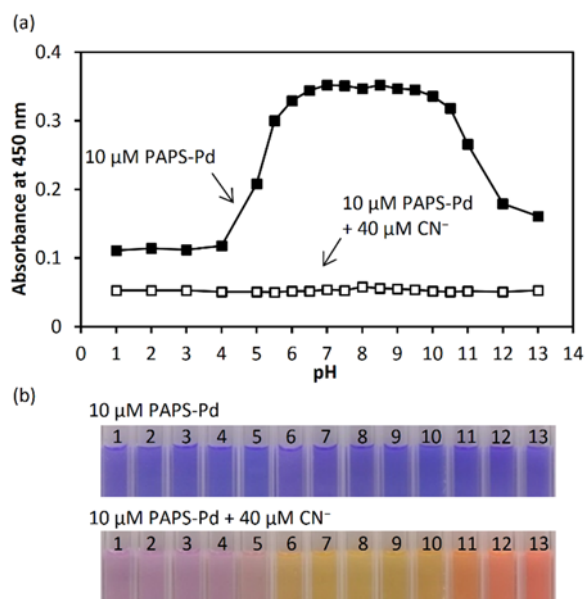

**Fig. S5.** Absorbance at 450 nm (a) and colour changes (b) of PAPS-Pd and a 1:4 mixture of PAPS-Pd and  $\text{CN}^-$  at different pH values (1–13).

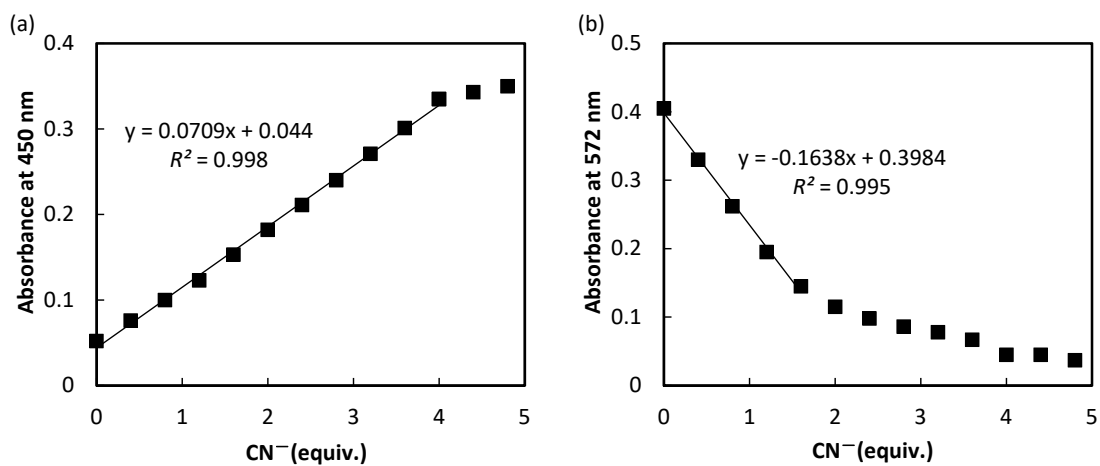

**Fig. S6.** Absorbance at 450 nm (a) and 572 nm (b) of calibration curve of PAPS-Pd (10  $\mu\text{M}$ ) as a function of the concentration of  $\text{CN}^-$  (0–48  $\mu\text{M}$ )

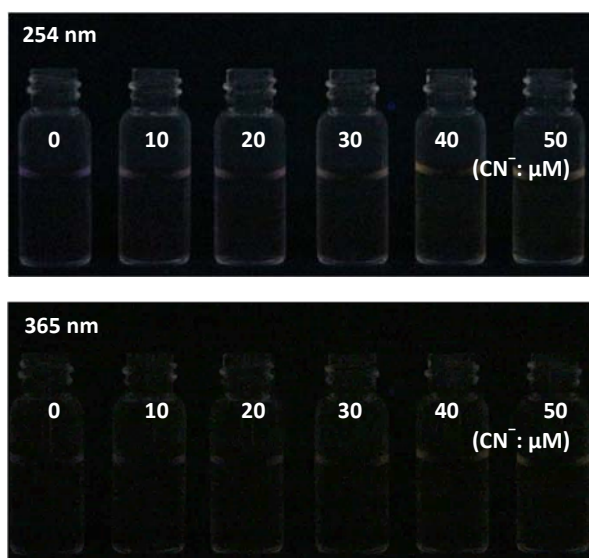

**Fig. S7.** The fluorescence change of PAPS-Pd (10  $\mu\text{M}$ ) in the presence of different concentrations of  $\text{CN}^-$  (0–50  $\mu\text{M}$ ) in pH 10.2 carbonate buffer.

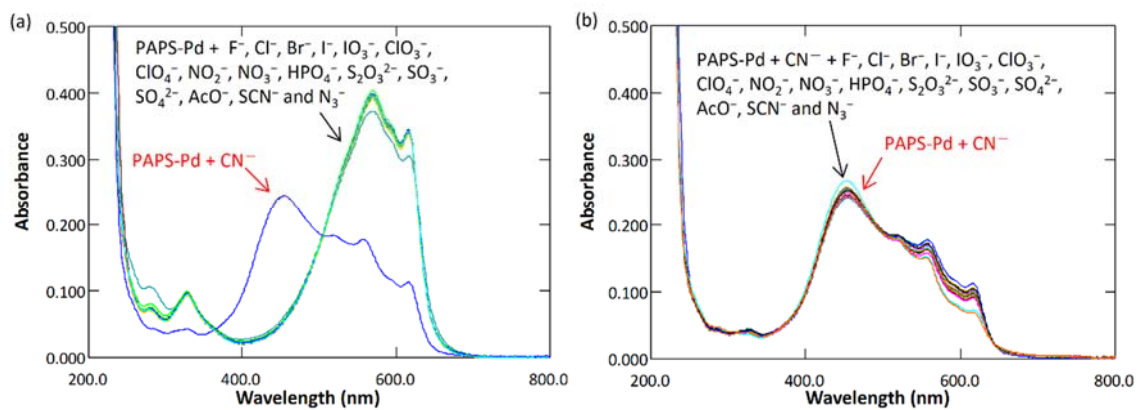

**Fig. S8.** UV-Vis spectra of PAPS-Pd (10  $\mu\text{M}$ ) with 30  $\mu\text{M}$  of various anions (a) and that of a mixture of 30  $\mu\text{M}$  of  $\text{CN}^-$  (b) in pH 10.2 carbonate buffer.

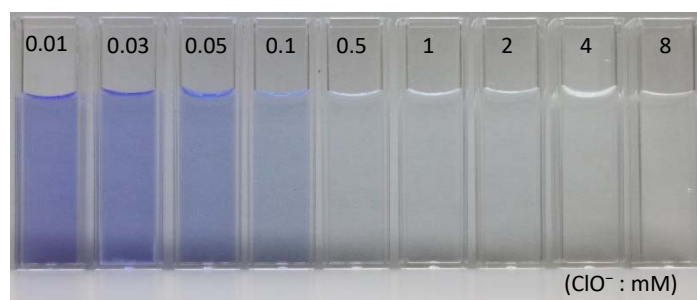

**Fig. S9.** Color changes of PAPS-Pd (10  $\mu\text{M}$ ) in the presence of different concentrations of  $\text{ClO}^-$  in pH 10.2 carbonate buffer.

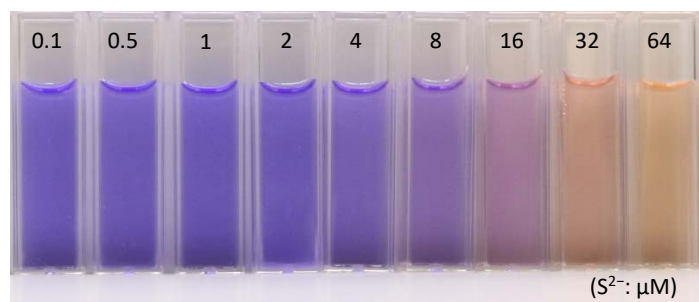

**Fig. S10.** Color changed of PAPS-Pd (10  $\mu\text{M}$ ) in the presence of different concentrations of  $\text{S}^{2-}$  in pH 10.2 carbonate buffer.

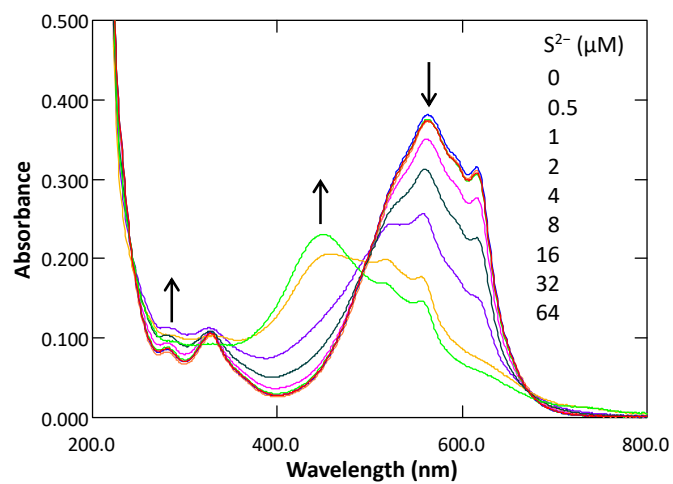

**Fig. S11.** UV-vis spectra of PAPS-Pd (10  $\mu\text{M}$ ) with different concentrations of  $\text{S}^{2-}$  in pH 10.2 carbonate buffer.

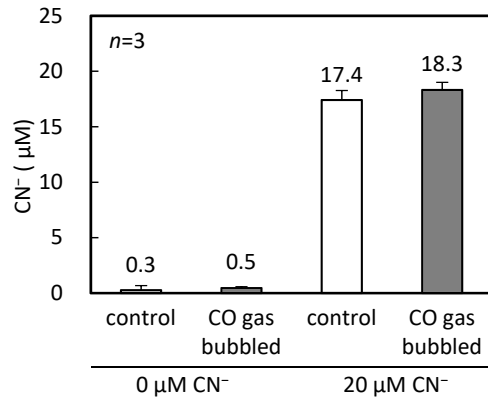

**Fig. S12.** Comparison of the CN<sup>-</sup> quantitative value between control and CO saturated whole blood.

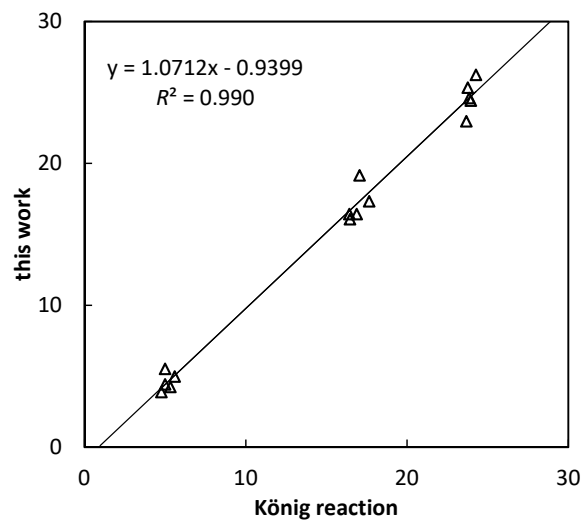

**Fig. S13.** Regression analysis for detected concentration of CN<sup>-</sup> in whole blood by the König reaction and this work.
